# Supplementary material for: Neonatal outcomes of pregnant women seropositive for rubella antibodies attending a tertiary hospital antenatal clinic in Kano, Nigeria
Source: Research Square preprint supplement (doi:10.21203/rs.3.rs-8775609/v1), 2026-02-22
Supplement: Supplementary file 1 [file 73cb2d65add8d50d37980806.docx]

QUESTIONNAIRE ON SEROPREVALENCE OF RUBELLA ANTIBODIES IN PREGNANT WOMEN AND THEIR NEONATAL OUTCOME ATTENDING ANTE-NATAL CLINIC AT AMINU KANO TEACHING HOSPITAL, KANO, NIGERIA.

SECTION A: SOCIO-DEMOGRAPHIC CHARACTERISTICS

Hospital number

PHONE NO:

1. ﻿﻿﻿Serial number
2. ﻿﻿﻿Age.
3. ﻿﻿﻿Religion (a) Islam (b) Christianity (c) others
4. ﻿﻿﻿Ethnicity (a) Hausa (b) Fulani (c) Igbo (d) Yoruba (e) others
5. ﻿﻿﻿Marital Status (a) married (b) single (c) divorced (d) widow
6. ﻿﻿﻿Education (a) none (b) Primary (c) Secondary (d) Tertiary
7. ﻿﻿﻿Occupation (a) Housewife (b) Civil servant (c) Trader (d) Others
8. ﻿﻿﻿Husband's occupation.
9. ﻿﻿﻿﻿Area of residence...

SECTION B: OBSTETRIC DATA

1. ﻿﻿﻿Parity..........................
2. ﻿﻿﻿Last Menstrual Period……………………
3. ﻿﻿﻿Expected date of delivery……………………..
4. ﻿﻿﻿Estimated gestational age………………………..

5 Mode of Delivery: (a) SVD (b) Caesarian delivery c) Instrumental delivery

SECTION C: POSSIBLE RISK FACTORS

1. ﻿﻿﻿Immunodeficiency a) Yes (b) No
2. ﻿﻿﻿Exposure to children (a) Yes (b) No
3. ﻿﻿﻿Area of residence……………………………………

SECTION D: NEONATAL OUTCOME

Birth weight…………………………

Apgar score

1st minute…………………………

5th minute…………………………

Congenital anomaly

Microcephaly

yes/no

Cataract

yes/no

Skin lesion

yes/no

Cardiac defect

yes/no

SECTION E: LABORATORY RESULTS FOR MATERNAL AND NEONATE

Maternal

IgM.....................

IgG……………………

Neonatal IgM……………………………………

Neonatal Haematocrit………………………

Neonatal Platelet count…………………….
